# Supplementary material for: Novel Insights into the Protective Properties of ACTH(4-7)PGP (Semax) Peptide at the Transcriptome Level Following Cerebral Ischaemia–Reperfusion in Rats
Source: Genes (Basel). 2020 Jun 22;11(6):681. doi: 10.3390/genes11060681 (PMC7350263; doi:10.3390/genes11060681)
Supplement: Supplementary file 1 [file genes-11-00681-s001.zip]

Archive with 15 entries (15 files):
- Supplementary Figure S3.docx
- Supplementary Figure S3.pdf
- Supplementary Table S3.xlsx
- Supplementary Table S4.xlsx
- Supplementary Table S5.xlsx
- Supplementary Table S6.xlsx
- Supplementary Table S7.xlsx
- Supplementary Table S8.xlsx
- Supplementary Table S9.xlsx
- Supplementary Table S1.xlsx
- Supplementary Table S2.xlsx
- Supplementary Figure S1.docx
- Supplementary Figure S1.pdf
- Supplementary Figure S2.docx
- Supplementary Figure S2.pdf
