# Supplementary material for: Novel Insights into the Protective Properties of ACTH(4-7)PGP (Semax) Peptide at the Transcriptome Level Following Cerebral Ischaemia–Reperfusion in Rats
Source: Genes (Basel). 2020 Jun 22;11(6):681. doi: 10.3390/genes11060681 (PMC7350263; doi:10.3390/genes11060681)
Supplement: Supplementary file 1 [file genes-11-00681-s001.zip › Supplementary Table S1.xlsx]

## Sheet: Лист1
Table S1. The characterization of the primers for real-time RT-PCR
Gene symbol	Primer (5'-3')	RefSeq ID	Amplicon size (bp)	Effectiveness ± standart error
Cplx2	F: GGAGGAGTGAGGAGGACGGG	XM_017600440.1	132	1,83±0,03
	R: CACCAAGCAGGGTAGATAGCAT
Fos	F: TGAAGAGGAAGAGAAACGGAGA	NM_022197.2	302	1,89±0
	R: ACTCTGGGGTGGTAGCCTCA
Gabra5	F: ATCGGGTACTTTGTCATCCA	NM_017295	224	1,96±0
	R: CAGACAGCAATGAACCAGT
Hspa1a	F: GCAGACCTTCACCACCTACTC	NM_031971.2	315	1,92±0,05
	R: TCGTCCTCCGCCTTGTAGC
Hspb1	F: GGCTACATCTCTCGGTGCTT	NM_031970.4	137	1,93±0,03
	R: GCTGATTGTGTGACTGCTTTG
Lrg1	F: ACTTGGACCTGGCGGAGAA	NM_001009717.1	108	1,9±0,05
	R: GCAGCGACTCAAGCAGGTT
Neurod6	F: ATCCGGTCTCTTGCCAATCCTCAG	NM_001109237.1	145	1,96±0
	R: CCTCAATGATGCTCTGGACAATTTGC
Ptk2b	F: CTTACGAGCCCTATGGAGTAT	NM_017318	407	2,08±0,06
	R: ATGACATTGTGGTACACGA
Ttr	F: AGCCGTTTGCCTCTGGGAA	NM_012681.2	158	2±0
	R: AACCACCTCTGCGTATTCAT
Vegfa	F: CCACGACAGAAGGGGAGCA	NM_031836.3	263	2±0
	R: GTGCTGGCTTTGGTGAGG
Gapdh	F: ACTCTACCCACGGCAAGTTCAACG	NM_017008.4	148	2,01±0,03
	R: GTAGACTCCACGACATACTCAGCAC
Rpl3	F: ATGGGTCCTTGGGCTTCTTG	NM_198753.2	239	1,9±0
	R: CACAATACCCACAACCACCA
