# Supplementary material for: Novel Insights into the Protective Properties of ACTH(4-7)PGP (Semax) Peptide at the Transcriptome Level Following Cerebral Ischaemia–Reperfusion in Rats
Source: Genes (Basel). 2020 Jun 22;11(6):681. doi: 10.3390/genes11060681 (PMC7350263; doi:10.3390/genes11060681)
Supplement: Supplementary file 1 [file genes-11-00681-s001.zip › Supplementary Table S2.xlsx]

## Sheet: Лист1
Table S2. Quantitative assessment of the volume of the ischaemic brain injury at 24 hours after tMCAO using magnetic resonance imaging
Administration	Type of ischaemic focus localization	Number of observations	Volume (mm3) Me [LQ;UQ]
			DWI	T2 WI
Saline	subcortical structures	18	46.1 [41.6; 56.92]	40.96 [36.06; 51.11]
Semax		9	40.03 [35.53; 47.94]	37.81 [26.82; 44.51]
Saline	subcortical structures +cortex	11	178.2 [119.01; 201.7]	142.48 [91.72; 173.09]
Semax		5	66.14 [57.29; 92.88]	56.83 [53.64; 74.6]
Here, Me [LQ; UQ] (the median (Me), the lower (LQ) and upper (UQ) quartiles for the 25 and 75 percentile interval) were used.
