# Supplementary material for: Novel Insights into the Protective Properties of ACTH(4-7)PGP (Semax) Peptide at the Transcriptome Level Following Cerebral Ischaemia–Reperfusion in Rats
Source: Genes (Basel). 2020 Jun 22;11(6):681. doi: 10.3390/genes11060681 (PMC7350263; doi:10.3390/genes11060681)
Supplement: Supplementary file 1 [file genes-11-00681-s001.zip › Supplementary Table S3.xlsx]

## Sheet: Лист1
Table S3. Analysis of the molecular function associated with Semax-induced DEGs (IS24 vs. IR24) using the PANTHER tool.
Molecular function	Number of upregulated DEGs	Number of downregulated DEGs
Binding (GO:0005488)	42	56
catalytic activity (GO:0003824)	23	35
Transporter activity (GO:0005215)	19	9
Receptor activity (GO:0004872)	17	6
Signal transducer activity (GO:0004871)	14	6
Structural molecule activity (GO:0005198)	1	8
Associative analysis for all comparison groups was carried out according to the Gene Ontology (GO) database.
