# Supplementary material for: Novel Insights into the Protective Properties of ACTH(4-7)PGP (Semax) Peptide at the Transcriptome Level Following Cerebral Ischaemia–Reperfusion in Rats
Source: Genes (Basel). 2020 Jun 22;11(6):681. doi: 10.3390/genes11060681 (PMC7350263; doi:10.3390/genes11060681)
Supplement: Supplementary file 1 [file genes-11-00681-s001.zip › Supplementary Table S4.xlsx]

## Sheet: David FuncCat
Table S4. Analysis of the functional categories of the proteins encoded by DEGs in IS24 vs. IR24.
Functional Categories	Up	Down	Padj	Up/(Up+Down), %	Down/(Up+Down), %
Disulfide bond	48	71	1.41794e-23	40.3	59.7
Glycoprotein	49	59	2.21611e-22	45.4	54.6
Signal	50	75	6.39488e-14	40	60
Secreted	15	45	7.28062e-12	25	75
Calcium	20	19	4.76557e-09	51.3	48.7
Extracellular matrix	6	12	3.44823e-08	33.3	66.7
Phosphoprotein	62	64	1.27887e-07	49.2	50.8
Cell junction	27	4	3.40211e-07	87.1	12.9
Synapse	22	1	2.13649e-06	95.7	4.3
Membrane	101	80	1.52973e-05	55.8	44.2
Alternative splicing	21	15	2.32198e-05	58.3	41.7
Proteoglycan	2	6	6.76127e-05	25	75
Innate immunity	2	11	8.42343e-05	15.4	84.6
Immunity	2	13	0.00182801	13.3	86.7
Postsynaptic cell membrane	11	1	0.0025732	91.7	8.3
Metal-binding	33	32	0.00361381	50.8	49.2
Neurogenesis	7	4	0.00690303	63.6	36.4
Transmembrane helix	77	66	0.00694594	53.8	46.2
Methylation	10	11	0.00708662	47.6	52.4
Ion transport	15	8	0.00709271	65.2	34.8
Microsome	1	3	0.00746689	25	75
Transmembrane	77	66	0.00807126	53.8	46.2
Glycosyltransferase	2	3	0.00921858	40	60
Cytoplasm	31	36	0.0140579	46.3	53.7
Cell membrane	51	29	0.0173449	63.8	36.3
Calcium/phospholipid-binding	1	3	0.0201978	25	75
Intermediate filament	1	6	0.0203481	14.3	85.7
Leucine-rich repeat	5	6	0.0210353	45.5	54.5
Lipid degradation	4	3	0.0277342	57.1	42.9
Cell adhesion	8	6	0.0330574	57.1	42.9
Endoplasmic reticulum	11	6	0.037361	64.7	35.3
Calmodulin-binding	7	1	0.0374298	87.5	12.5
Ion channel	11	3	0.0387323	78.6	21.4
Ubl conjugation	11	16	0.0437395	40.7	59.3
Associative analysis of DEGs for comparison groups was carried out according to the DAVID database. The number of up-regulated (Up) and down-regulated (Down) DEGs, as well as the P-values adjusted using the Benjamini–Hochberg procedure (Padj), are shown. Functional categories with a P-value <0.05 were selected for analysis.
The functional categories associated with more than 80 presents of up-regulated DEGs
The functional categories associated with more than 80 presents of down-regulated DEGs
