# Supplementary material for: Novel Insights into the Protective Properties of ACTH(4-7)PGP (Semax) Peptide at the Transcriptome Level Following Cerebral Ischaemia–Reperfusion in Rats
Source: Genes (Basel). 2020 Jun 22;11(6):681. doi: 10.3390/genes11060681 (PMC7350263; doi:10.3390/genes11060681)
Supplement: Supplementary file 1 [file genes-11-00681-s001.zip › Supplementary Table S5.xlsx]

## Sheet: Лист1
Table S5. Analysis of DEGs that overlapped between IS24 vs. IR24 and IR24 vs. SH24
RefSeq ID	Gene symbol	Description	IS24 vs. IR24		IR24 vs. SH24
			Ratio	Padj	Ratio	Padj
NM_031806	Gpr6	G protein-coupled receptor 6 (Gpr6), mRNA	5.42134	0.00205037	0.0853834	0.000393457
NM_017130	Neu2	sialidase 2 (Neu2), mRNA	3.49206	0.00892903	0.146711	0.000393457
NM_024383	Hes5	hes family bHLH transcription factor 5 (Hes5), mRNA	3.22185	0.00205037	0.24677	0.000393457
NM_031696	Gpr88	G-protein coupled receptor 88 (Gpr88), mRNA	2.9555	0.00205037	0.137622	0.000393457
NM_012547	Drd2	no definition	2.63299	0.00205037	0.162923	0.000393457
NM_001109237	Neurod6	neuronal differentiation 6 (Neurod6), mRNA	2.62351	0.00205037	0.267734	0.000393457
NM_173098	Slc9a4	solute carrier family 9, subfamily A (NHE4, cation proton antiporter 4), member 4 (Slc9a4), mRNA	2.47478	0.00512593	0.350506	0.000393457
NM_001107522	Slc35d3	solute carrier family 35, member D3 (Slc35d3), mRNA	2.46347	0.00205037	0.265258	0.000393457
NM_001100888	St6gal2	ST6 beta-galactosamide alpha-2,6-sialyltranferase 2 (St6gal2), mRNA	2.44149	0.0134696	0.444406	0.00577034
NM_181370	Hs3st2	heparan sulfate (glucosamine) 3-O-sulfotransferase 2 (Hs3st2), mRNA	2.43515	0.00205037	0.591755	0.00532411
NM_133515	Akap5	A kinase (PRKA) anchor protein 5 (Akap5), mRNA	2.40652	0.00205037	0.353433	0.000393457
NM_138506	Adra2c	adrenoceptor alpha 2C (Adra2c), mRNA	2.39732	0.00205037	0.272858	0.000393457
NM_001071777	Gpr17	G protein-coupled receptor 17 (Gpr17), mRNA	2.39564	0.00205037	0.307778	0.000393457
NM_053294	Adora2a	adenosine A2a receptor (Adora2a), mRNA	2.38637	0.00205037	0.13697	0.000393457
NM_017139	Penk	no definition	2.2573	0.00205037	0.230025	0.000393457
NM_001276720	Otof	no definition	2.25274	0.00205037	0.241466	0.000393457
NM_024365	Htr6	5-hydroxytryptamine (serotonin) receptor 6, G protein-coupled (Htr6), mRNA	2.22921	0.0277829	0.289581	0.000393457
NM_022236	Pde10a	phosphodiesterase 10A (Pde10a), mRNA	2.21886	0.00205037	0.20708	0.000393457
NM_019224	Rgs9	regulator of G-protein signaling 9 (Rgs9), mRNA	2.21198	0.00205037	0.140093	0.000393457
NM_001077201	Caln1	calneuron 1 (Caln1), mRNA	2.19156	0.00205037	0.426111	0.000393457
NM_001107371	Neto1	neuropilin (NRP) and tolloid (TLL)-like 1 (Neto1), mRNA	2.13647	0.00205037	0.461915	0.000393457
NM_030993	Ddn	dendrin (Ddn), mRNA	2.10821	0.00205037	0.422745	0.000393457
NM_024138	Gng7	guanine nucleotide binding protein (G protein), gamma 7 (Gng7), mRNA	2.07373	0.00205037	0.175261	0.000393457
NM_001107758	Meis2	Meis homeobox 2 (Meis2), mRNA	2.0355	0.00205037	0.337012	0.000393457
NM_031628	Nr4a3	nuclear receptor subfamily 4, group A, member 3 (Nr4a3), mRNA	2.03087	0.00205037	0.32939	0.000393457
NM_001107212	Adamts3	ADAM metallopeptidase with thrombospondin type 1, motif 3 (Adamts3), mRNA	2.01532	0.00205037	0.394799	0.000393457
NM_001191874	Gareml	GRB2 associated, regulator of MAPK1-like (Gareml), mRNA	1.9978	0.00205037	0.524295	0.000393457
NM_001025712	Itm2a	integral membrane protein 2A (Itm2a), mRNA	1.95125	0.00205037	0.372789	0.000393457
NM_012546	Drd1	dopamine receptor D1 (Drd1), mRNA	1.92881	0.00205037	0.262919	0.000393457
NM_178333	Sytl5	synaptotagmin-like 5 (Sytl5), mRNA	1.91859	0.0277829	0.532536	0.00953011
NM_031045	Itpka	inositol-trisphosphate 3-kinase A (Itpka), mRNA	1.91469	0.00205037	0.326494	0.000393457
NM_001142652	Neurl1b	neuralized E3 ubiquitin protein ligase 1B (Neurl1b), mRNA	1.91099	0.00205037	0.589214	0.00239222
NM_001276440	Krt71	keratin 71 (Krt71), mRNA	1.89795	0.0373536	0.397567	0.000393457
NM_001034010	Tril	TLR4 interactor with leucine-rich repeats (Tril), mRNA	1.89485	0.00205037	0.41183	0.000393457
NM_001109260	RGD1561849	similar to RIKEN cDNA 3110035E14 (RGD1561849), mRNA	1.87122	0.00205037	0.479393	0.000393457
NM_030868	Nov	nephroblastoma overexpressed (Nov), mRNA	1.86649	0.00205037	0.513464	0.000393457
NM_019189	Hapln1	hyaluronan and proteoglycan link protein 1 (Hapln1), mRNA	1.86549	0.00205037	0.420976	0.000393457
NM_013161	Pnlip	pancreatic lipase (Pnlip), mRNA	1.86255	0.0270556	0.389653	0.000393457
NM_001277287; NM_001277288	Bcl11b	B cell CLL/lymphoma 11B	1.84943	0.00205037	0.33119	0.000393457
NM_001109467	Emid1	EMI domain containing 1 (Emid1), mRNA	1.83998	0.0206739	0.345826	0.000393457
NM_001109580	Sertm1	serine-rich and transmembrane domain containing 1 (Sertm1), mRNA	1.83405	0.00205037	0.471503	0.000393457
NM_001108603	Ptprt	protein tyrosine phosphatase, receptor type, T (Ptprt), mRNA	1.8207	0.00205037	0.522669	0.000393457
NM_022234	Asic4	acid-sensing (proton-gated) ion channel family member 4 (Asic4), mRNA	1.82036	0.00205037	0.267498	0.000393457
NM_031645	Ramp1	receptor (G protein-coupled) activity modifying protein 1 (Ramp1), mRNA	1.81683	0.00205037	0.425712	0.000393457
NM_019304	Dgkb	diacylglycerol kinase, beta (Dgkb), mRNA	1.81527	0.00205037	0.409513	0.000393457
NM_031823	Wfs1	Wolfram syndrome 1 (wolframin) (Wfs1), mRNA	1.81283	0.00205037	0.50001	0.000393457
NM_001134534	Btbd17	BTB (POZ) domain containing 17 (Btbd17), mRNA	1.80724	0.00892903	0.432655	0.000393457
NM_001130569	Mpped1	metallophosphoesterase domain containing 1 (Mpped1), mRNA	1.78813	0.00205037	0.438759	0.000393457
NM_001108971	RGD1309821	similar to KIAA1161 protein (RGD1309821), mRNA	1.78245	0.00205037	0.479057	0.000393457
NM_021680	Nxph4	neurexophilin 4 (Nxph4), mRNA	1.7785	0.0236949	0.3443	0.000393457
NM_022600	Adcy5	adenylate cyclase 5 (Adcy5), mRNA	1.77027	0.00205037	0.349613	0.000393457
NM_214457	Phactr1	no definition	1.75998	0.00205037	0.354923	0.000393457
NM_138521	Ppp1r1b	protein phosphatase 1, regulatory (inhibitor) subunit 1B (Ppp1r1b), mRNA	1.75921	0.00205037	0.237864	0.000393457
NM_031547	Chrm4	cholinergic receptor, muscarinic 4 (Chrm4), mRNA	1.75698	0.00205037	0.277064	0.000393457
NM_001191093	Rnf150	ring finger protein 150 (Rnf150), mRNA	1.74997	0.00892903	0.605485	0.00682061
NM_001134643	Kcnq5	potassium voltage-gated channel, KQT-like subfamily, member 5 (Kcnq5), mRNA	1.74909	0.00205037	0.413727	0.000393457
NM_019137	Egr4	early growth response 4 (Egr4), mRNA	1.74355	0.00205037	0.293272	0.000393457
NM_053572	Cdhr1	cadherin-related family member 1 (Cdhr1), mRNA	1.73615	0.0213789	0.640968	0.0219568
NM_001107616	Cpne5	copine V (Cpne5), mRNA	1.73546	0.00205037	0.369514	0.000393457
NM_001109259	RGD1564053	similar to hypothetical protein (RGD1564053), transcript variant 1, mRNA	1.73259	0.0152367	0.553523	0.00133785
NM_001191817	Hhip	Hedgehog-interacting protein (Hhip), mRNA	1.73017	0.00205037	0.565981	0.000393457
NM_080773	Chrm1	cholinergic receptor, muscarinic 1 (Chrm1), mRNA	1.7233	0.00205037	0.406574	0.000393457
NM_001130575	Rspo2	R-spondin 2 (Rspo2), mRNA	1.71012	0.0386014	0.549349	0.00403992
NM_001106545	Kcng1	potassium voltage-gated channel, subfamily G, member 1 (Kcng1), mRNA	1.7072	0.00205037	0.589832	0.000393457
NM_001172079	Icam5	intercellular adhesion molecule 5, telencephalin (Icam5), mRNA	1.70557	0.00205037	0.457632	0.000393457
NM_001105712	Grm3	glutamate receptor, metabotropic 3 (Grm3), mRNA	1.7027	0.00205037	0.597803	0.000393457
NM_023026	Agap2	ArfGAP with GTPase domain, ankyrin repeat and PH domain 2 (Agap2), mRNA	1.7005	0.00205037	0.423569	0.000393457
NM_019294	Cacna1e	calcium channel, voltage-dependent, R type, alpha 1E subunit (Cacna1e), mRNA	1.69442	0.00205037	0.495422	0.000393457
NM_001108234	Neu4	sialidase 4 (Neu4), mRNA	1.68699	0.00657092	0.420171	0.000393457
NM_001168630	Cdh9	cadherin 9, type 2, T1-cadherin (Cdh9), mRNA	1.68653	0.00892903	0.530531	0.000393457
NM_001109935	Ctxn1	cortexin 1 (Ctxn1), mRNA	1.68291	0.00205037	0.441921	0.000393457
NM_021687	Erbb4	v-erb-b2 avian erythroblastic leukemia viral oncogene 4 (Erbb4), mRNA	1.6826	0.00205037	0.660629	0.00334934
NM_017357	Hpcal4	hippocalcin-like 4 (Hpcal4), mRNA	1.67643	0.00205037	0.43916	0.000393457
NM_080894	Pde7b	phosphodiesterase 7B (Pde7b), mRNA	1.67599	0.00512593	0.5452	0.000393457
NM_024388	Nr4a1	nuclear receptor subfamily 4, group A, member 1 (Nr4a1), mRNA	1.67036	0.00205037	0.264375	0.000393457
NM_001108470	Mzf1	myeloid zinc finger 1 (Mzf1), mRNA	1.66444	0.00205037	0.524604	0.000393457
NM_017295	Gabra5	gamma-aminobutyric acid (GABA) A receptor, alpha 5 (Gabra5), mRNA	1.66234	0.00205037	0.500427	0.000393457
NM_001145175	Shisa7	shisa family member 7 (Shisa7), mRNA	1.65894	0.00205037	0.450635	0.000393457
NM_022264	Kit	v-kit Hardy-Zuckerman 4 feline sarcoma viral oncogene homolog (Kit), mRNA	1.65505	0.00205037	0.490866	0.000393457
NM_199106	Galnt13	polypeptide N-acetylgalactosaminyltransferase 13 (Galnt13), mRNA	1.65475	0.0134696	0.544727	0.000393457
NM_001110797; NM_020098	Pclo	piccolo (presynaptic cytomatrix protein)	1.64918	0.00205037	0.621275	0.000393457
NM_001135045; NM_001135046	Arpp21	cAMP-regulated phosphoprotein 21 (Arpp21), mRNA	1.64791	0.00205037	0.369235	0.000393457
NM_001106058	Cldn10	claudin 10 (Cldn10), mRNA	1.64615	0.00205037	0.400782	0.000393457
NM_033499	Scrg1	stimulator of chondrogenesis 1 (Scrg1), mRNA	1.64421	0.0236949	0.504757	0.000393457
NM_019167	Sptbn2	spectrin, beta, non-erythrocytic 2 (Sptbn2), mRNA	1.63845	0.00205037	0.469394	0.000393457
NM_001191902	Sp9	trans-acting transcription factor 9 (Sp9), mRNA	1.62948	0.0413134	0.420518	0.000393457
NM_031765	Rxrg	retinoid X receptor gamma (Rxrg), mRNA	1.62928	0.00892903	0.342499	0.000393457
NM_013045	Tnr	tenascin R (Tnr), mRNA	1.62598	0.00205037	0.568014	0.000393457
NM_001003711	Jph4	junctophilin 4 (Jph4), mRNA	1.62499	0.00205037	0.442187	0.000393457
NM_053424	Slc4a4	solute carrier family 4, sodium bicarbonate cotransporter, member 4 (Slc4a4), mRNA	1.62412	0.00205037	0.646092	0.000393457
NM_001082977	Rasgrp2	RAS guanyl releasing protein 2 (calcium and DAG-regulated) (Rasgrp2), mRNA	1.62213	0.00205037	0.262416	0.000393457
NM_017012	Grm5	glutamate receptor, metabotropic 5 (Grm5), mRNA	1.61956	0.00205037	0.58303	0.000393457
NM_001106214	Lix1	Lix1 homolog (chicken) (Lix1), mRNA	1.61756	0.00205037	0.411807	0.000393457
NM_053878	Cplx2	complexin 2 (Cplx2), mRNA	1.61681	0.00205037	0.478377	0.000393457
NM_001143847; NM_001270604; NM_031079	Pde2a	phosphodiesterase 2A, cGMP-stimulated (Pde2a), mRNA	1.61394	0.00205037	0.428899	0.000393457
NM_131906	Slco1a2	solute carrier organic anion transporter family, member 1A2 (Slco1a2), mRNA	1.60776	0.00205037	0.555141	0.000393457
NM_001106387	Lrrtm3	leucine rich repeat transmembrane neuronal 3 (Lrrtm3), mRNA	1.60625	0.00366623	0.536377	0.000393457
NM_022710	Pde1b	phosphodiesterase 1B, calmodulin-dependent (Pde1b), mRNA	1.60307	0.00205037	0.279901	0.000393457
NM_023974	Synpr	synaptoporin (Synpr), mRNA	1.60151	0.00205037	0.460611	0.000393457
NM_001136241	Ngef	neuronal guanine nucleotide exchange factor (Ngef), mRNA	1.60121	0.00205037	0.347752	0.000393457
NM_212528	Col11a2	collagen, type XI, alpha 2 (Col11a2), mRNA	1.60033	0.00205037	0.34205	0.000393457
NM_017122	Hpca	hippocalcin (Hpca), mRNA	1.59459	0.00205037	0.344929	0.000393457
NM_001108438	Dok4	docking protein 4 (Dok4), mRNA	1.59289	0.0455494	0.570341	0.00239222
NM_001039013	Tle2	transducin-like enhancer of split 2 (Tle2), mRNA	1.58998	0.0455494	0.477026	0.000393457
NM_001135603	Celf5	CUGBP, Elav-like family member 5 (Celf5), mRNA	1.58816	0.00205037	0.449321	0.000393457
NM_001009504	Fbxl16	F-box and leucine-rich repeat protein 16 (Fbxl16), mRNA	1.58671	0.00205037	0.416708	0.000393457
NM_012971	Kcna4	potassium voltage-gated channel, shaker-related subfamily, member 4 (Kcna4), mRNA	1.58424	0.0206739	0.522914	0.000393457
NM_024140	Nrgn	neurogranin (Nrgn), mRNA	1.58313	0.00205037	0.409484	0.000393457
NM_001271104	Foxp2	forkhead box P2 (Foxp2), mRNA	1.58002	0.0101711	0.526301	0.000393457
NM_138893	Myo16	myosin XVI (Myo16), mRNA	1.57579	0.00784136	0.653973	0.00286781
NM_012920	Camk2a	no definition	1.57475	0.00205037	0.489659	0.000393457
NM_139097	Scn3b	sodium channel, voltage-gated, type III, beta subunit (Scn3b), mRNA	1.57382	0.00205037	0.464996	0.000393457
NM_001170325	Actn2	actinin alpha 2 (Actn2), mRNA	1.57355	0.00512593	0.379594	0.000393457
NM_001164505	Rnf165	ring finger protein 165 (Rnf165), mRNA	1.57278	0.00205037	0.646685	0.000393457
NM_001191800	Dclk3	doublecortin-like kinase 3 (Dclk3), mRNA	1.57256	0.00892903	0.451088	0.000393457
NM_001107587	Slitrk2	SLIT and NTRK-like family, member 2 (Slitrk2), mRNA	1.56935	0.0124249	0.624652	0.00215492
NM_024000	Camkv	CaM kinase-like vesicle-associated (Camkv), mRNA	1.5646	0.00205037	0.443461	0.000393457
NM_001110137; NM_021751	Prom1	prominin 1 (Prom1), transcript variant 1, mRNA	1.56341	0.00512593	0.44859	0.000393457
NM_153735	Nptx1	neuronal pentraxin I (Nptx1), mRNA	1.5632	0.00205037	0.583095	0.000393457
NM_001100473	Wnt7a	wingless-type MMTV integration site family, member 7A (Wnt7a), mRNA	1.56205	0.00892903	0.550523	0.000393457
NM_001107605	Neurl1	neuralized E3 ubiquitin protein ligase 1 (Neurl1), mRNA	1.56169	0.00205037	0.523892	0.000393457
NM_001077641	Plcb1	phospholipase C, beta 1 (phosphoinositide-specific) (Plcb1), mRNA	1.56	0.00205037	0.554237	0.000393457
NM_032083	Chn1	chimerin 1 (Chn1), mRNA	1.55482	0.00205037	0.446766	0.000393457
NM_134370	Psd	pleckstrin and Sec7 domain containing (Psd), mRNA	1.55048	0.00205037	0.4759	0.000393457
NM_053788	Stx1a	syntaxin 1A (brain) (Stx1a), mRNA	1.55039	0.00205037	0.601417	0.000393457
NM_001033665; NM_012916	Bcan	brevican (Bcan), transcript variant 1, mRNA	1.54694	0.00205037	0.488686	0.000393457
NM_001191628	Tenm4	teneurin transmembrane protein 4 (Tenm4), mRNA	1.54072	0.00205037	0.622456	0.000393457
NM_001258011	Snhg11	small nucleolar RNA host gene 11 (non-protein coding) (Snhg11), mRNA	1.5403	0.00205037	0.503978	0.000393457
NM_001007235; NM_001270596; NM_001270597	Itpr1	inositol 1,4,5-trisphosphate receptor, type 1 (Itpr1), mRNA	1.54028	0.00205037	0.399003	0.000393457
NM_212522	Sptb	spectrin, beta, erythrocytic (Sptb), mRNA	1.53947	0.00205037	0.491438	0.000393457
NM_001105754	Sez6	seizure related 6 homolog (mouse) (Sez6), mRNA	1.53936	0.00205037	0.457493	0.000393457
NM_053721	Rasgrf2	no definition	1.53936	0.00512593	0.580501	0.000393457
NM_001107577	Lrrc10b	leucine rich repeat containing 10B (Lrrc10b), mRNA	1.53647	0.0206739	0.23506	0.000393457
NM_001108453	Cbfa2t3	core-binding factor, runt domain, alpha subunit 2; translocated to, 3 (Cbfa2t3), mRNA	1.53572	0.0245333	0.535133	0.000393457
NM_022940	Pdzd2	PDZ domain containing 2 (Pdzd2), mRNA	1.53372	0.00205037	0.552699	0.000393457
NM_001109485	Syndig1l	synapse differentiation inducing 1-like (Syndig1l), mRNA	1.53331	0.00657092	0.227169	0.000393457
NM_001107155	Tmem119	transmembrane protein 119 (Tmem119), mRNA	1.53236	0.00784136	0.46902	0.000393457
NM_172022	Lzts3	leucine zipper, putative tumor suppressor family member 3 (Lzts3), mRNA	1.53122	0.00205037	0.384728	0.000393457
NM_001100980	Efnb3	ephrin B3 (Efnb3), mRNA	1.52706	0.00205037	0.536122	0.000393457
NM_175708	Car11	carbonic anhydrase 11 (Car11), mRNA	1.52685	0.00205037	0.355889	0.000393457
NM_019374	Pdyn	prodynorphin (Pdyn), mRNA	1.52536	0.00205037	0.456976	0.000393457
NM_001105917	Actl6b	actin-like 6B (Actl6b), mRNA	1.5249	0.00657092	0.481788	0.000393457
NM_001037327	Csmd1	CUB and Sushi multiple domains 1 (Csmd1), mRNA	1.52176	0.00366623	0.552714	0.000393457
NM_001112742; NM_032990	Gria3	glutamate receptor, ionotropic, AMPA 3 (Gria3), mRNA	1.52143	0.00205037	0.504854	0.000393457
NM_001107977	Heyl	hes-related family bHLH transcription factor with YRPW motif-like (Heyl), mRNA	1.51994	0.00512593	0.528303	0.000393457
NM_001108657	Runx1t1	runt-related transcription factor 1; translocated to, 1 (cyclin D-related) (Runx1t1), mRNA	1.51714	0.0294576	0.527558	0.000393457
NM_019169	Snca	synuclein, alpha (non A4 component of amyloid precursor) (Snca), mRNA	1.51129	0.00366623	0.508052	0.000393457
NM_001109338	Slc35f1	solute carrier family 35, member F1 (Slc35f1), mRNA	1.51069	0.00205037	0.638804	0.000393457
NM_057142	Lrrc7	leucine rich repeat containing 7 (Lrrc7), mRNA	1.5098	0.00512593	0.602508	0.000393457
NM_001007727	Lypd1	Ly6/Plaur domain containing 1 (Lypd1), mRNA	1.50776	0.00366623	0.579002	0.000393457
NM_001108199	Trerf1	transcriptional regulating factor 1 (Trerf1), mRNA	1.50666	0.0245333	0.512387	0.000393457
NM_020088	Tenm2	teneurin transmembrane protein 2	1.50647	0.00205037	0.607716	0.000393457
NM_021859	Matk	megakaryocyte-associated tyrosine kinase (Matk), mRNA	1.50354	0.00366623	0.465028	0.000393457
NM_134403	Abtb2	ankyrin repeat and BTB (POZ) domain containing 2 (Abtb2), mRNA	1.50302	0.044359	0.587947	0.00104443
NM_001100784	Gjc2	gap junction protein, gamma 2 (Gjc2), mRNA	1.50067	0.00205037	0.459348	0.000393457
NM_001271058; NM_001271059; NM_001271060; NM_001271061; NM_001271062; NM_173096	Mx1	myxovirus (influenza virus) resistance 1 (Mx1), mRNA	1.52956	0.0236949	2.64031	0.000393457
NM_001136124	Ifitm3	interferon induced transmembrane protein 3 (Ifitm3), mRNA	0.665928	0.00657092	5.65274	0.000393457
NM_138826	Mt1a	metallothionein 1a (Mt1a), mRNA	0.664901	0.00366623	4.8732	0.000393457
NM_001017478	Cxcl16	chemokine (C-X-C motif) ligand 16 (Cxcl16), mRNA	0.664855	0.0124249	5.04911	0.000393457
NM_052809	Cdo1	cysteine dioxygenase type 1 (Cdo1), mRNA	0.663807	0.00205037	2.43447	0.000393457
NM_001108099	Mdm2	MDM2 proto-oncogene, E3 ubiquitin protein ligase (Mdm2), mRNA	0.662025	0.00366623	1.97522	0.000393457
NM_001002807	Clic1	chloride intracellular channel 1 (Clic1), mRNA	0.661787	0.00205037	5.46734	0.000393457
NM_012591	Irf1	interferon regulatory factor 1 (Irf1), mRNA	0.661743	0.0229302	2.41056	0.000393457
NM_001108441	Dnajb1	DnaJ (Hsp40) homolog, subfamily B, member 1 (Dnajb1), mRNA	0.659293	0.00205037	1.91366	0.000393457
NM_001008349	Nfkb2	nuclear factor of kappa light polypeptide gene enhancer in B-cells 2, p49/p100 (Nfkb2), mRNA	0.659212	0.0308662	3.0914	0.000393457
NM_212466	Cfb	complement factor B (Cfb), mRNA	0.659086	0.00366623	2.73841	0.000393457
NM_138882	Pla1a	phospholipase A1 member A (Pla1a), mRNA	0.657665	0.0229302	8.25192	0.000393457
NM_021835	Jun	jun proto-oncogene (Jun), mRNA	0.65636	0.00205037	1.83459	0.000393457
NM_012924	Cd44	Cd44 molecule (Cd44), mRNA	0.652582	0.00205037	15.4143	0.000393457
NM_001002016	Lmna	lamin A/C (Lmna), mRNA	0.650225	0.00205037	2.35523	0.000393457
NM_030863	Msn	moesin (Msn), mRNA	0.649824	0.00205037	4.85012	0.000393457
NM_001008320	Rhoj	ras homolog family member J (Rhoj), mRNA	0.648789	0.0287052	2.25713	0.000393457
NM_001025420	Lsp1	no definition	0.648779	0.00366623	7.88915	0.000393457
NM_031114	S100a10	S100 calcium binding protein A10 (S100a10), mRNA	0.648745	0.00205037	3.83512	0.000393457
NM_057127	Slc26a2	solute carrier family 26 (anion exchanger), member 2 (Slc26a2), mRNA	0.647297	0.0381136	3.75067	0.000393457
NM_031771	Thbd	thrombomodulin (Thbd), mRNA	0.646728	0.00784136	3.32937	0.000393457
NM_022251	Enpep	no definition	0.643014	0.0294576	2.56776	0.000393457
NM_001276477	Rps27l	ribosomal protein S27-like (Rps27l), mRNA	0.638915	0.00512593	2.88918	0.000393457
NM_030847	Emp3	epithelial membrane protein 3 (Emp3), mRNA	0.638429	0.0198549	5.41995	0.000393457
NM_001008328	Parp3	poly (ADP-ribose) polymerase family, member 3 (Parp3), mRNA	0.636838	0.00205037	3.2771	0.000393457
NM_032085	Col3a1	collagen, type III, alpha 1 (Col3a1), mRNA	0.635797	0.00657092	2.0302	0.000393457
NM_022934	Dnaja1	DnaJ (Hsp40) homolog, subfamily A, member 1 (Dnaja1), mRNA	0.635607	0.00205037	2.02609	0.000393457
NM_053802	Tgfbi	transforming growth factor, beta induced (Tgfbi), mRNA	0.635013	0.0143285	1.52297	0.00468593
NM_024159	Dab2	disabled 2, mitogen-responsive phosphoprotein (Dab2), mRNA	0.634845	0.00205037	2.45515	0.000393457
NM_017097	Ctsc	cathepsin C (Ctsc), mRNA	0.634794	0.00205037	3.58711	0.000393457
NM_001024275	Rassf4	Ras association (RalGDS/AF-6) domain family member 4 (Rassf4), mRNA	0.632843	0.00784136	2.79185	0.000393457
NM_024155	Anxa4	annexin A4 (Anxa4), mRNA	0.63126	0.00205037	1.83788	0.000393457
NM_017365	Pdlim1	PDZ and LIM domain 1 (Pdlim1), mRNA	0.630499	0.00366623	2.21892	0.000393457
NM_001270762; NM_001270763; NM_139105	Rnh1	ribonuclease/angiogenin inhibitor 1 (Rnh1), mRNA	0.630447	0.00205037	2.40144	0.000393457
NM_001271143	S1pr3	sphingosine-1-phosphate receptor 3 (S1pr3), mRNA	0.630031	0.00205037	9.94148	0.000393457
NM_012515	Tspo	translocator protein (Tspo), mRNA	0.626604	0.00205037	6.4106	0.000393457
NM_001009541	Ier2	immediate early response 2 (Ier2), mRNA	0.626315	0.00205037	1.85744	0.000393457
NM_001025675	Tubb6	tubulin, beta 6 class V (Tubb6), mRNA	0.625551	0.00205037	8.62742	0.000393457
NM_024127	Gadd45a	growth arrest and DNA-damage-inducible, alpha (Gadd45a), mRNA	0.625276	0.00205037	5.33863	0.000393457
NM_012967	Icam1	no definition	0.625244	0.00512593	3.35746	0.000393457
NM_212525	Tyrobp	Tyro protein tyrosine kinase binding protein (Tyrobp), mRNA	0.624371	0.00512593	3.36447	0.000393457
NM_012945	Hbegf	heparin-binding EGF-like growth factor (Hbegf), mRNA	0.622133	0.00205037	6.34918	0.000393457
NM_207603	Fcgr3a	Fc fragment of IgG, low affinity IIIa, receptor (Fcgr3a), mRNA	0.620856	0.00205037	9.27926	0.000393457
NM_175756	Fcgr2b	Fc fragment of IgG, low affinity IIb, receptor (CD32) (Fcgr2b), mRNA	0.62075	0.00205037	7.31476	0.000393457
NM_053896	Aldh1a2	aldehyde dehydrogenase 1 family, member A2 (Aldh1a2), mRNA	0.620727	0.00784136	1.55609	0.00468593
NM_139096	Lgals3bp	lectin, galactoside-binding, soluble, 3 binding protein (Lgals3bp), mRNA	0.619703	0.00205037	2.17225	0.000393457
NM_212505	Ier3	immediate early response 3 (Ier3), mRNA	0.618473	0.00892903	2.98289	0.000393457
NM_001106286	Lyve1	lymphatic vessel endothelial hyaluronan receptor 1 (Lyve1), mRNA	0.617141	0.0113269	3.35965	0.000393457
NM_001108068	Sbno2	strawberry notch homolog 2 (Drosophila) (Sbno2), mRNA	0.615636	0.00205037	3.90922	0.000393457
NM_031970	Hspb1	heat shock protein B1 (Hspb1), mRNA	0.610906	0.00205037	33.5679	0.000393457
NM_053612	Hspb8	heat shock protein B8 (Hspb8), mRNA	0.610817	0.00205037	2.54328	0.000393457
NM_021744	Cd14	CD14 molecule (Cd14), mRNA	0.609405	0.00205037	29.6741	0.000393457
NM_012603	Myc	myelocytomatosis oncogene (Myc), mRNA	0.608145	0.00205037	7.75975	0.000393457
NM_178094	Itpkc	no definition	0.60804	0.00205037	2.24946	0.000393457
NM_001105719	Mip	major intrinsic protein of lens fiber (Mip), mRNA	0.604865	0.00205037	1.64416	0.00073223
NM_012862	Mgp	matrix Gla protein (Mgp), mRNA	0.604352	0.00205037	1.99143	0.000393457
NM_024145	Fgr	feline Gardner-Rasheed sarcoma viral oncogene (Fgr), mRNA	0.602888	0.0206739	4.8586	0.000393457
NM_001109398	Mthfd2	methylenetetrahydrofolate dehydrogenase (NADP+ dependent) 2, methenyltetrahydrofolate cyclohydrolase (Mthfd2), mRNA	0.601983	0.00205037	2.87755	0.000393457
NM_133290	Zfp36	no definition	0.598934	0.00205037	4.92697	0.000393457
NM_012904	Anxa1	annexin A1 (Anxa1), mRNA	0.598926	0.00205037	5.46249	0.000393457
NM_001013062	Thbs1	thrombospondin 1 (Thbs1), mRNA	0.598913	0.00366623	4.34089	0.000393457
NM_001100988	Spidr	scaffolding protein involved in DNA repair (Spidr), mRNA	0.594778	0.0113269	2.639	0.000393457
NM_001109422	Bcl3	B-cell CLL/lymphoma 3 (Bcl3), mRNA	0.594192	0.00366623	10.7856	0.000393457
NM_001106824	Pstpip1	proline-serine-threonine phosphatase-interacting protein 1 (Pstpip1), mRNA	0.594084	0.0245333	5.86357	0.000393457
NM_001007144	Plin2	perilipin 2 (Plin2), mRNA	0.593446	0.00205037	5.45402	0.000393457
NM_001107031	Slfn2	schlafen 2 (Slfn2), mRNA	0.59278	0.00205037	1.99177	0.000393457
NM_198769	Tlr2	toll-like receptor 2 (Tlr2), mRNA	0.589819	0.00205037	3.68374	0.000393457
NM_207601	Plp2	proteolipid protein 2 (colonic epithelium-enriched) (Plp2), mRNA	0.587218	0.00784136	5.66121	0.000393457
NM_001108786	Csrnp1	no definition	0.586489	0.00205037	4.62695	0.000393457
NM_022531	Des	desmin (Des), mRNA	0.583301	0.00205037	3.38044	0.000393457
NM_001007735	Sertad1	SERTA domain containing 1 (Sertad1), mRNA	0.58275	0.00205037	2.21214	0.000393457
NM_001047858	Srxn1	no definition	0.582185	0.00205037	3.39144	0.000393457
NM_001173437	Chac1	ChaC, cation transport regulator homolog 1 (E, coli) (Chac1), mRNA	0.579252	0.00205037	2.26901	0.000393457
NM_031140	Vim	vimentin (Vim), mRNA	0.578725	0.00205037	6.19953	0.000393457
NM_133380	Il4r	interleukin 4 receptor (Il4r), mRNA	0.578502	0.00205037	3.41762	0.000393457
NM_022667	Slco2a1	solute carrier organic anion transporter family, member 2a1 (Slco2a1), mRNA	0.577122	0.0134696	3.77702	0.000393457
NM_019386	Tgm2	transglutaminase 2 (Tgm2), mRNA	0.574427	0.00205037	3.24703	0.000393457
NM_001107877	Adamts9	no definition	0.574133	0.00205037	5.05507	0.000393457
NM_001008321	Gadd45b	growth arrest and DNA-damage-inducible, beta (Gadd45b), mRNA	0.572332	0.00205037	3.34965	0.000393457
NM_001107100	Col8a1	collagen, type VIII, alpha 1 (Col8a1), mRNA	0.569999	0.00892903	2.37565	0.000393457
NM_012987	Nes	nestin (Nes), mRNA	0.568945	0.00205037	7.66247	0.000393457
NM_001134716	Clec12a	C-type lectin domain family 12, member A (Clec12a), mRNA	0.566848	0.0392757	8.65648	0.00133785
NM_199370	Krt8	keratin 8 (Krt8), mRNA	0.566436	0.00205037	1.6907	0.000393457
NM_133624	Gbp2	guanylate binding protein 2, interferon-inducible (Gbp2), mRNA	0.566006	0.00205037	5.27003	0.000393457
NM_001039549; NM_001039691; NM_012683; NM_057105; NM_130407; NM_175846; NM_201423; NM_201424; NM_201425	Ugt1a5; Ugt1a6; Ugt1a1; Ugt1a6; Ugt1a7c; Ugt1a8; Ugt1a2; Ugt1a3; Ugt1a9	UDP glucuronosyltransferase 1 family, polypeptide A5 (Ugt1a5), mRNA; UDP glucuronosyltransferase 1 family, polypeptide A6 (Ugt1a6), transcript variant 1, mRNA; UDP glucuronosyltransferase 1 family, polypeptide A1 (Ugt1a1), mRNA; UDP glucuronosyltransferase 1 family, polypeptide A6 (Ugt1a6), transcript variant 2, mRNA; UDP glucuronosyltransferase 1 family, polypeptide A7C (Ugt1a7c), mRNA; UDP glyc…	0.565751	0.00205037	2.55845	0.000393457
NM_001011936	Bag3	Bcl2-associated athanogene 3 (Bag3), mRNA	0.564949	0.00205037	3.015	0.000393457
NM_013026	Sdc1	syndecan 1 (Sdc1), mRNA	0.561631	0.00205037	14.582	0.000393457
NM_001106045	Sox7	SRY (sex determining region Y)-box 7 (Sox7), mRNA	0.556147	0.00205037	6.03955	0.000393457
NM_057187	Grifin	galectin-related inter-fiber protein (Grifin), mRNA	0.554684	0.0152367	1.52382	0.0338971
NM_001025053	Galnt4	no definition	0.553352	0.0182105	3.22983	0.000393457
NM_019370	Enpp3	ectonucleotide pyrophosphatase/phosphodiesterase 3 (Enpp3), mRNA	0.552936	0.00657092	2.53859	0.000393457
NM_031832	Lgals3	lectin, galactoside-binding, soluble, 3 (Lgals3), mRNA	0.552789	0.00205037	26.5973	0.000393457
NM_001005384	Osmr	oncostatin M receptor (Osmr), mRNA	0.549043	0.00205037	15.458	0.000393457
NM_030834	Slc16a3	solute carrier family 16 (monocarboxylate transporter), member 3 (Slc16a3), mRNA	0.547093	0.0101711	2.94466	0.000393457
NM_001047101	Adamts7	ADAM metallopeptidase with thrombospondin type 1 motif, 7 (Adamts7), mRNA	0.546446	0.00205037	8.76832	0.000393457
NM_001100836	Fcgr1a	Fc fragment of IgG, high affinity Ia, receptor (CD64) (Fcgr1a), mRNA	0.546445	0.00205037	4.69121	0.000393457
NM_053882	Ecm1	extracellular matrix protein 1 (Ecm1), mRNA	0.545327	0.00205037	2.19012	0.000393457
NM_001008363	Zfand2a	zinc finger, AN1-type domain 2A (Zfand2a), mRNA	0.545284	0.00205037	2.89445	0.000393457
NM_001105966	Creg1	cellular repressor of E1A-stimulated genes 1 (Creg1), mRNA	0.545231	0.00205037	2.29307	0.000393457
NM_001031658	Slc11a1	solute carrier family 11 (proton-coupled divalent metal ion transporter), member 1 (Slc11a1), mRNA	0.544592	0.00205037	4.87716	0.000393457
NM_053619	C5ar1	complement component 5a receptor 1 (C5ar1), mRNA	0.53868	0.00205037	10.0231	0.000393457
NM_199115	Angptl4	angiopoietin-like 4 (Angptl4), mRNA	0.538016	0.00205037	4.92594	0.000393457
NM_001173386	Clec7a	C-type lectin domain family 7, member A (Clec7a), mRNA	0.536215	0.0316343	11.7153	0.00073223
NM_022197	Fos	no definition	0.534038	0.00205037	2.72487	0.000393457
NM_001109228	Ssmem1	no definition	0.531966	0.0198549	1.71126	0.0111032
NM_001008847	RT1-Da	RT1 class II, locus Da (RT1-Da), mRNA	0.527582	0.00512593	1.61422	0.00800034
NM_012953	Fosl1	fos-like antigen 1 (Fosl1), mRNA	0.52682	0.00205037	11.8028	0.000393457
NM_001109358	Sesn2	sestrin 2 (Sesn2), mRNA	0.525882	0.00205037	3.04664	0.000393457
NM_024400	Adamts1	ADAM metallopeptidase with thrombospondin type 1 motif, 1 (Adamts1), mRNA	0.522704	0.00205037	5.05013	0.000393457
NM_053565	Socs3	suppressor of cytokine signaling 3 (Socs3), mRNA	0.519858	0.00205037	38.8233	0.000393457
NM_001012357	Ccl9	chemokine (C-C motif) ligand 9 (Ccl9), mRNA	0.514623	0.00205037	2.49177	0.000393457
NM_001013941	LOC298795	similar to 14-3-3 protein sigma (LOC298795), mRNA	0.514179	0.0334323	4.93233	0.000393457
NM_001108563	Sypl2	synaptophysin-like 2 (Sypl2), mRNA	0.51304	0.00205037	6.86919	0.000393457
NM_031804	Cish	cytokine inducible SH2-containing protein (Cish), mRNA	0.51071	0.0270556	2.42484	0.00263568
NM_134454	Angpt2	angiopoietin 2 (Angpt2), mRNA	0.510101	0.00205037	3.66786	0.000393457
NM_001011901	Hsph1	heat shock 105/110 protein 1 (Hsph1), mRNA	0.509167	0.00205037	2.54536	0.000393457
NM_133296	Slc6a20	solute carrier family 6 (proline IMINO transporter), member 20 (Slc6a20), mRNA	0.508939	0.00205037	2.23135	0.000393457
NM_001013086	Capg	capping protein (actin filament), gelsolin-like (Capg), mRNA	0.508214	0.00205037	7.50801	0.000393457
NM_001004095	S100a11	S100 calcium binding protein A11 (S100a11), mRNA	0.507215	0.00205037	5.02509	0.000393457
NM_181086	Tnfrsf12a	tumor necrosis factor receptor superfamily, member 12a (Tnfrsf12a), mRNA	0.506727	0.00205037	8.53192	0.000393457
NM_012715	Adm	adrenomedullin (Adm), mRNA	0.504197	0.00657092	3.89494	0.000393457
NM_001169138	Thbs2	thrombospondin 2 (Thbs2), mRNA	0.494266	0.00205037	2.02975	0.000393457
NM_001031638	Cd68	Cd68 molecule (Cd68), mRNA	0.493233	0.00205037	8.50942	0.000393457
NM_012771	Lyz2	lysozyme 2 (Lyz2), mRNA	0.492703	0.00205037	2.40256	0.000393457
NM_019905	Anxa2	annexin A2 (Anxa2), mRNA	0.486274	0.00205037	4.6891	0.000393457
NM_001109334	Rnf225	similar to chromosome 6 open reading frame 148 (RGD1561909), mRNA	0.484423	0.00205037	5.01031	0.000393457
NM_001276712	Sfrp1	secreted frizzled-related protein 1 (Sfrp1), mRNA	0.479625	0.00205037	2.19006	0.000393457
NM_013069	Cd74	Cd74 molecule, major histocompatibility complex, class II invariant chain (Cd74), mRNA	0.476227	0.00205037	2.01295	0.000393457
NM_181382	Gldn	gliomedin (Gldn), mRNA	0.475145	0.00205037	2.70536	0.000393457
NM_001015020	Tgif1	TGFB-induced factor homeobox 1 (Tgif1), mRNA	0.474362	0.00205037	2.32302	0.000393457
NM_001191939	Msr1	macrophage scavenger receptor 1 (Msr1), mRNA	0.471928	0.00205037	82.1905	0.0112633
NM_019216	Gdf15	growth differentiation factor 15 (Gdf15), mRNA	0.469768	0.0182105	3.36954	0.000393457
NM_012912	Atf3	no definition	0.468162	0.00205037	4.74932	0.000393457
NM_022393	Clec10a	C-type lectin domain family 10, member A (Clec10a), mRNA	0.46148	0.0134696	3.83283	0.000393457
NM_031699	Cldn1	claudin 1 (Cldn1), mRNA	0.459934	0.00512593	1.55711	0.0216868
NM_053485	S100a6	S100 calcium binding protein A6 (S100a6), mRNA	0.457328	0.00205037	5.80864	0.000393457
NM_001077640	Gadd45g	no definition	0.455834	0.00205037	4.12182	0.000393457
NM_053455	Fgl2	fibrinogen-like 2 (Fgl2), mRNA	0.454071	0.00205037	9.33086	0.000393457
NM_001044265	Steap4	STEAP family member 4 (Steap4), mRNA	0.445773	0.00205037	6.45421	0.000393457
NM_017232	Ptgs2	prostaglandin-endoperoxide synthase 2 (Ptgs2), mRNA	0.43649	0.00205037	2.95212	0.000393457
NM_001034140	Baiap2l1	BAI1-associated protein 2-like 1 (Baiap2l1), mRNA	0.43407	0.0198549	1.73144	0.0288398
NM_001108353	Plac8	placenta-specific 8 (Plac8), mRNA	0.426285	0.00205037	6.64998	0.000393457
NM_001106314	Ifitm1	interferon induced transmembrane protein 1 (Ifitm1), mRNA	0.424734	0.00205037	5.41702	0.000393457
NM_001107159	Mmp19	matrix metallopeptidase 19 (Mmp19), mRNA	0.424642	0.00205037	4.36742	0.000393457
NM_001009717	Lrg1	leucine-rich alpha-2-glycoprotein 1 (Lrg1), mRNA	0.419665	0.00205037	7.04617	0.000393457
NM_001109022	Inmt	indolethylamine N-methyltransferase (Inmt), mRNA	0.393084	0.00205037	6.80087	0.000393457
NM_001004242	Arhgap8	Rho GTPase activating protein 8 (Arhgap8), mRNA	0.384656	0.0163193	2.25024	0.0103835
NM_001079890	Gprc5a	G protein-coupled receptor, class C, group 5, member A (Gprc5a), mRNA	0.364571	0.00205037	8.71264	0.00490471
NM_001031642	Serpinb1a	serine (or cysteine) proteinase inhibitor, clade B, member 1a (Serpinb1a), mRNA	0.358529	0.00205037	3.07528	0.000393457
NM_144750	Aspg	asparaginase (Aspg), mRNA	0.357328	0.00205037	11.8033	0.000393457
NM_031557	Ptgis	prostaglandin I2 (prostacyclin) synthase (Ptgis), mRNA	0.349802	0.00205037	2.60517	0.000393457
NM_130741	Lcn2	lipocalin 2 (Lcn2), mRNA	0.32979	0.00205037	65.1377	0.000393457
NM_017208	Lbp	lipopolysaccharide binding protein (Lbp), mRNA	0.281633	0.00205037	8.77519	0.000393457
NM_031971; NM_212504	Hspa1a	heat shock protein family A (Hsp70) member 1A	0.263653	0.00205037	82.7266	0.000393457
NM_001034848	Gh1	growth hormone 1 (Gh1), mRNA	0.237441	0.00366623	7.69025	0.00781824
NM_001004202	Ccl6	chemokine (C-C motif) ligand 6 (Ccl6), mRNA	0.202286	0.0386014	5.77111	0.016582
NM_053587	S100a9	S100 calcium binding protein A9 (S100a9), mRNA	0.199109	0.00205037	7.48452	0.00189886
NM_012794	Glycam1	glycosylation dependent cell adhesion molecule 1 (Glycam1), mRNA	0.104777	0.00205037	19.9761	0.000393457
Only those genes that decrease the expression of more than 1.5-fold from the baseline value and whose p-value lower 0.05 were selected for analysis.
Only those genes that increase the expression of more than 1.5-fold from the baseline value and whose p-value lower 0.05 were selected for analysis.
