# Supplementary material for: Novel Insights into the Protective Properties of ACTH(4-7)PGP (Semax) Peptide at the Transcriptome Level Following Cerebral Ischaemia–Reperfusion in Rats
Source: Genes (Basel). 2020 Jun 22;11(6):681. doi: 10.3390/genes11060681 (PMC7350263; doi:10.3390/genes11060681)
Supplement: Supplementary file 1 [file genes-11-00681-s001.zip › Supplementary Table S6.xlsx]

## Sheet: Лист1
Table S6. Analysis of DEGs that changed their expression in IS24 vs. IR24, but did not change it in IR24 vs. SH24
RefSeq ID	Gene symbol	Description	IS24 vs. IR24		IR24 vs. SH24
			Ratio	Padj	Ratio	Padj
NM_001039020	Zfp207	zinc finger protein 207 (Zfp207), mRNA	3.26445	0.00366623	1.09887	0.80172
NM_001109163	Fam111a	family with sequence similarity 111, member A (Fam111a), mRNA	2.18023	0.00205037	6.30152	1
NM_031605	Cyp4a8	cytochrome P450, family 4, subfamily a, polypeptide 8 (Cyp4a8), mRNA	2.04818	0.00205037	1.46582	0.0855573
NM_001107311	Enpp6	ectonucleotide pyrophosphatase/phosphodiesterase 6 (Enpp6), mRNA	2.03814	0.0270556	0.798558	0.440672
NM_053504	Prss12	protease, serine, 12 neurotrypsin (motopsin) (Prss12), mRNA	2.01594	0.0206739	0.697972	1
NM_001191849	Ndst4	N-deacetylase/N-sulfotransferase (heparan glucosaminyl) 4 (Ndst4), mRNA	1.92773	0.0206739	0.662462	1
NM_012800	P2ry1	purinergic receptor P2Y, G-protein coupled, 1 (P2ry1), mRNA	1.80928	0.0381136	0.698243	1
NM_001271228	Pcdh11x	protocadherin 11 X-linked (Pcdh11x), mRNA	1.76921	0.00205037	0.839199	0.311186
NM_012742	Foxa1	forkhead box A1 (Foxa1), mRNA	1.76773	0.00205037	0.766739	0.124447
NM_181636	Col23a1	collagen, type XXIII, alpha 1 (Col23a1), mRNA	1.76412	0.00205037	0.691695	0.0262239
NM_001105880	Zbtb20	zinc finger and BTB domain containing 20 (Zbtb20), mRNA	1.70328	0.00205037	0.806377	0.0975258
NM_053379	Dcx	doublecortin (Dcx), mRNA	1.6656	0.00205037	0.713716	0.00970131
NM_001099483; NM_001099657	Vom2r36; Vom2r34	vomeronasal 2 receptor, 36 (Vom2r36), mRNA; vomeronasal 2 receptor, 34 (Vom2r34), mRNA	1.66423	0.0432782	0.666753	0.0452302
NM_001105783	Wnt9a	wingless-type MMTV integration site family, member 9A (Wnt9a), mRNA	1.65497	0.0386014	0.668977	0.0432814
NM_001108206	Tcte1	t-complex-associated testis expressed 1 (Tcte1), mRNA	1.65334	0.00205037	0.683173	0.0119703
NM_012988	Nfia	nuclear factor I/A (Nfia), mRNA	1.65082	0.00205037	1.00447	0.982476
NM_001169129	Pcdh19	protocadherin 19 (Pcdh19), mRNA	1.64035	0.00366623	0.796201	0.121238
NM_001035233; NM_017215	Slc1a2	no definition	1.6159	0.00205037	0.674237	0.000393457
NM_001106083	Ing2	inhibitor of growth family, member 2 (Ing2), mRNA	1.58121	0.0143285	0.763869	0.090305
NM_172030	Entpd2	ectonucleoside triphosphate diphosphohydrolase 2 (Entpd2), mRNA	1.57776	0.00205037	0.705872	0.00510803
NM_031751	Shank1	SH3 and multiple ankyrin repeat domains 1 (Shank1), mRNA	1.57269	0.00205037	0.819366	0.101256
NM_001191804	Tmem151b	transmembrane protein 151B (Tmem151b), mRNA	1.55535	0.00205037	0.728002	0.0111032
NM_001013980	Cyyr1	cysteine/tyrosine-rich 1 (Cyyr1), mRNA	1.55414	0.00892903	0.753817	0.0470809
NM_001100482	Slc5a11	solute carrier family 5 (sodium/glucose cotransporter), member 11 (Slc5a11), mRNA	1.54996	0.0342938	0.686339	0.0275804
NM_080405	Gli3	GLI family zinc finger 3 (Gli3), mRNA	1.54978	0.0406651	0.733442	0.0672351
NM_001134578	RGD1309139	similar to CG5435-PA (RGD1309139), mRNA	1.54682	0.0213789	0.953061	0.821975
NM_001107279	Pcdh17	protocadherin 17 (Pcdh17), mRNA	1.54591	0.00205037	0.726015	0.00617962
NM_012726	Atxn1	ataxin 1 (Atxn1), mRNA	1.53787	0.00205037	0.683028	0.0038002
NM_012567	Gja1	gap junction protein, alpha 1 (Gja1), mRNA	1.5345	0.00205037	0.690874	0.00104443
NM_080906	Ddit4	DNA-damage-inducible transcript 4 (Ddit4), mRNA	1.52452	0.00205037	0.874823	0.296167
NM_012574	Grin2b	glutamate receptor, ionotropic, N-methyl D-aspartate 2B (Grin2b), mRNA	1.5217	0.00205037	0.673445	0.000393457
NM_019146	Bsn	bassoon (presynaptic cytomatrix protein) (Bsn), mRNA	1.51995	0.00205037	0.669452	0.000393457
NM_001191782	Nav3	neuron navigator 3 (Nav3), mRNA	1.50593	0.00205037	0.860545	0.257561
NM_012956	Gabrb1	gamma-aminobutyric acid (GABA) A receptor, beta 1 (Gabrb1), mRNA	1.50269	0.00892903	1.05829	0.741704
NM_133401	Abcb1a	ATP-binding cassette, sub-family B (MDR/TAP), member 1A (Abcb1a), mRNA	1.50082	0.00205037	0.677317	0.00104443
NM_001025682	Cdr2	cerebellar degeneration-related protein 2 (Cdr2), mRNA	0.660929	0.00366623	1.47875	0.00073223
NM_013222	Gfer	growth factor, augmenter of liver regeneration (Gfer), mRNA	0.65998	0.0245333	1.25762	0.119425
NM_001106765	RGD1310212	similar to KIAA1111-like protein (RGD1310212), mRNA	0.654449	0.0386014	1.38298	0.0488209
NM_001106846	Cldn2	claudin 2 (Cldn2), mRNA	0.652302	0.0101711	1.04135	0.810325
NM_001270630; NM_001270631; NM_001270632; NM_001270633; NM_001270634; NM_001270635; NM_001270636; NM_001270637; NM_001270638; NM_012513	Bdnf	brain-derived neurotrophic factor (Bdnf), mRNA	0.645587	0.0198549	1.30162	0.0862801
NM_001127575	Calml4	calmodulin-like 4 (Calml4), mRNA	0.642214	0.0448865	1.02544	0.906121
NM_030838	Slco1a5	solute carrier organic anion transporter family, member 1a5 (Slco1a5), mRNA	0.640998	0.0413134	1.11856	0.539856
NM_053608	Kcnj13	potassium inwardly-rectifying channel, subfamily J, member 13 (Kcnj13), mRNA	0.639208	0.0124249	1.01444	0.938044
NM_001134933; NM_001244867	Crip1	cysteine-rich protein 1 (intestinal) (Crip1), mRNA	0.6356	0.0467831	1.39077	0.0562425
NM_133307	Prkcd	protein kinase C, delta (Prkcd), mRNA	0.629895	0.00205037	1.13897	0.310011
NM_001034111; NM_012630	Prlr	prolactin receptor (Prlr), mRNA	0.626186	0.0213789	1.44238	0.0346278
NM_024129	Dcn	decorin (Dcn), mRNA	0.623583	0.00657092	1.32344	0.0572429
NM_001107039	Sgca	sarcoglycan, alpha (dystrophin-associated glycoprotein) (Sgca), mRNA	0.622524	0.0485465	1.45327	0.0464015
NM_001108137	Mfrp	membrane frizzled-related protein (Mfrp), mRNA	0.616482	0.00205037	1.15832	0.270994
NM_017174	Pla2g5	phospholipase A2, group V (Pla2g5), mRNA	0.608196	0.0455494	1.0325	0.892755
NM_001166676	Parpbp	PARP1 binding protein (Parpbp), mRNA	0.593656	0.00205037	1.32661	0.0347755
NM_053976	Krt18	keratin 18 (Krt18), mRNA	0.591696	0.0143285	1.26454	0.189883
NM_001135855	Scara5	scavenger receptor class A, member 5 (Scara5), mRNA	0.586816	0.0392757	1.47755	0.0483212
NM_001107760	Dll4	delta-like 4 (Drosophila) (Dll4), mRNA	0.585837	0.0213789	1.35394	0.086421
NM_001008854	RT1-N2	RT1 class Ib, locus N2 (RT1-N2), mRNA	0.570906	0.0373536	1.03169	0.905432
NM_013122	Igfbp2	insulin-like growth factor binding protein 2 (Igfbp2), mRNA	0.565285	0.00205037	1.43776	0.00189886
NM_133527	Folr1	folate receptor 1 (adult) (Folr1), mRNA	0.55978	0.00205037	1.05682	0.739475
NM_053938	Cdh3	cadherin 3 (Cdh3), mRNA	0.557987	0.0245333	0.98598	0.9602
NM_001191856	Bmp7	bone morphogenetic protein 7 (Bmp7), mRNA	0.553923	0.00784136	1.3428	0.074009
NM_031336	Kl	Klotho (Kl), mRNA	0.532737	0.00205037	1.40508	0.00532411
NM_080698	Fmod	fibromodulin (Fmod), mRNA	0.531041	0.00205037	1.15371	0.302033
NM_181368	Mustn1	musculoskeletal, embryonic nuclear protein 1 (Mustn1), mRNA	0.529398	0.0254042	1.3223	0.220042
NM_001107721	Abca4	ATP-binding cassette, subfamily A (ABC1), member 4 (Abca4), mRNA	0.512461	0.00205037	1.43932	0.0162588
NM_133385	Ucn2	urocortin 2 (Ucn2), mRNA	0.486941	0.0182105	1	0.000393457
NM_012778	Aqp1	aquaporin 1 (Aqp1), mRNA	0.482276	0.00205037	1.47482	0.00133785
NM_001047878	F5	coagulation factor V (proaccelerin, labile factor) (F5), mRNA	0.460639	0.00205037	1.44231	0.00357613
NM_001108710	Coch	cochlin (Coch), mRNA	0.458216	0.0485465	0.651488	0.0646188
NM_001008724; NM_052797	Fga; Fga	fibrinogen alpha chain (Fga), transcript variant 1, mRNA; no definition	0.452133	0.022144	13.1271	0.195271
NM_001107887	Cd163	CD163 molecule (Cd163), mRNA	0.451241	0.00205037	4.24973	1
NM_031531	Serpina3n	serine (or cysteine) peptidase inhibitor, clade A, member 3N (Serpina3n), mRNA	0.439636	0.00205037	913.36	0.261557
NM_052805	Chrna3	cholinergic receptor, nicotinic, alpha 3 (neuronal) (Chrna3), mRNA	0.415226	0.00205037	0.968044	0.883431
NM_013025	Ccl3	chemokine (C-C motif) ligand 3 (Ccl3), mRNA	0.392507	0.00366623	17.9296	0.108352
NM_153626	Npas4	neuronal PAS domain protein 4 (Npas4), mRNA	0.37945	0.00205037	1.42179	0.049194
NM_001004086	Pon3	paraoxonase 3 (Pon3), mRNA	0.364141	0.0308662	0.96863	0.931353
NM_001077680	Bpifb1	BPI fold containing family B, member 1 (Bpifb1), mRNA	0.358792	0.0206739	16.2292	0.0635812
NM_032077	Pon1	paraoxonase 1 (Pon1), mRNA	0.30795	0.00205037	1.25549	0.340353
NM_181633	Gpr151	G protein-coupled receptor 151 (Gpr151), mRNA	0.281421	0.00205037	1.22484	0.414527
NM_017133	Thbs4	thrombospondin 4 (Thbs4), mRNA	0.267539	0.00205037	22.3588	0.10835
NM_133523	Mmp3	no definition	0.181333	0.0113269	76.7439	0.274727
NM_053372	Slpi	secretory leukocyte peptidase inhibitor (Slpi), mRNA	0.162464	0.0461333	14.3446	0.10835
NM_001134602	Mcemp1	mast cell-expressed membrane protein 1 (Mcemp1), mRNA	0.0746787	0.0461333	1	0.000393457
Only those genes that decrease the expression of more than 1.5-fold from the baseline value and whose p-value lower 0.05 were selected for analysis.
Only those genes that increase the expression of more than 1.5-fold from the baseline value and whose p-value lower 0.05 were selected for analysis.
