# Supplementary material for: Novel Insights into the Protective Properties of ACTH(4-7)PGP (Semax) Peptide at the Transcriptome Level Following Cerebral Ischaemia–Reperfusion in Rats
Source: Genes (Basel). 2020 Jun 22;11(6):681. doi: 10.3390/genes11060681 (PMC7350263; doi:10.3390/genes11060681)
Supplement: Supplementary file 1 [file genes-11-00681-s001.zip › Supplementary Table S7.xlsx]

## Sheet: Лист1
Table S7. Analysis of the molecular functions associated with the DEGs using the PANTHER tool.
Molecular function	Genes that changed their expression in IS24 vs. IR24, but didn’t change it in IR24 vs. SH24
	Up	Down
binding (GO:0005488)	3	13
catalytic activity (GO:0003824)	2	7
transporter activity (GO:0005215)	5	4
receptor activity (GO:0004872)	3	1
signal transducer activity (GO:0004871)	3	1
Associative analysis for all comparison groups was carried out according to the Gene Ontology (GO) database.
