# Supplementary material for: Novel Insights into the Protective Properties of ACTH(4-7)PGP (Semax) Peptide at the Transcriptome Level Following Cerebral Ischaemia–Reperfusion in Rats
Source: Genes (Basel). 2020 Jun 22;11(6):681. doi: 10.3390/genes11060681 (PMC7350263; doi:10.3390/genes11060681)
Supplement: Supplementary file 1 [file genes-11-00681-s001.zip › Supplementary Table S8.xlsx]

## Sheet: GSEA_SI24
Table S8. Analysis of the functional annotations of DEGs in IS24 vs. IR24 using GSEA
Gene Set Name	Description	number of DEGs	Up	Down	p-value	FDR q-value	Up/(Up+Down), %	Down/(Up+Down), %
BIOCARTA_CK1_PATHWAY	Regulation of ck1/cdk5 by type 1 glutamate receptors	12	12	0	1.66E-5	5.46E-4	1	0
KEGG_GNRH_SIGNALING_PATHWAY	GnRH signaling pathway	14	14	0	8.68E-6	3.17E-4	1	0
REACTOME_CGMP_EFFECTS	cGMP effects	4	4	0	1.66E-5	5.46E-4	1	0
REACTOME_NEGATIVE_REGULATION_OF_NMDA_RECEPTOR_MEDIATED_NEURONAL_TRANSMISSION	Negative regulation of NMDA receptor-mediated neuronal transmission	4	4	0	5.25E-5	1.4E-3	1	0
REACTOME_NITRIC_OXIDE_STIMULATES_GUANYLATE_CYCLASE	Nitric oxide stimulates guanylate cyclase	4	4	0	6.37E-5	1.59E-3	1	0
REACTOME_CREB1_PHOSPHORYLATION_THROUGH_NMDA_RECEPTOR_MEDIATED_ACTIVATION_OF_RAS_SIGNALING	CREB1 phosphorylation through NMDA receptor-mediated activation of RAS signaling	5	5	0	8.12E-6	3.02E-4	1	0
REACTOME_RAS_ACTIVATION_UPON_CA2_INFLUX_THROUGH_NMDA_RECEPTOR	Ras activation upon Ca2+ influx through NMDA receptor	5	5	0	1.37E-6	7.19E-5	1	0
REACTOME_UNBLOCKING_OF_NMDA_RECEPTORS_GLUTAMATE_BINDING_AND_ACTIVATION	Unblocking of NMDA receptors, glutamate binding and activation	5	5	0	1.78E-6	8.64E-5	1	0
REACTOME_AMINE_LIGAND_BINDING_RECEPTORS	Amine ligand-binding receptors	6	6	0	3.83E-6	1.61E-4	1	0
REACTOME_LONG_TERM_POTENTIATION	Long-term potentiation	6	6	0	8.66E-8	7.74E-6	1	0
REACTOME_PROTEIN_PROTEIN_INTERACTIONS_AT_SYNAPSES	Protein-protein interactions at synapses	7	7	0	2.88E-5	8.44E-4	1	0
REACTOME_INTEGRATION_OF_ENERGY_METABOLISM	Integration of energy metabolism	8	8	0	1.42E-5	4.96E-4	1	0
REACTOME_REGULATION_OF_INSULIN_SECRETION	Regulation of insulin secretion	8	8	0	1.23E-6	6.7E-5	1	0
REACTOME_ACTIVATION_OF_NMDA_RECEPTORS_AND_POSTSYNAPTIC_EVENTS	Activation of NMDA receptors and postsynaptic events	9	8	1	4.78E-7	2.99E-5	0.888889	0.111111
REACTOME_OPIOID_SIGNALLING	Opioid Signalling	9	8	1	3.29E-7	2.33E-5	0.888889	0.111111
REACTOME_NEURONAL_SYSTEM	Neuronal System	27	24	3	1.89E-14	7.03E-12	0.888889	0.111111
REACTOME_TRANSMISSION_ACROSS_CHEMICAL_SYNAPSES	Transmission across Chemical Synapses	20	17	3	5.45E-12	1.11E-9	0.85	0.15
REACTOME_G_PROTEIN_MEDIATED_EVENTS	G-protein mediated events	6	5	1	1.7E-5	5.51E-4	0.833333	0.166667
REACTOME_NEUROTRANSMITTER_RECEPTORS_AND_POSTSYNAPTIC_SIGNAL_TRANSMISSION	Neurotransmitter receptors and postsynaptic signal transmission	17	14	3	3.91E-11	5.82E-9	0.823529	0.176471
REACTOME_ASSEMBLY_AND_CELL_SURFACE_PRESENTATION_OF_NMDA_RECEPTORS	Assembly and cell surface presentation of NMDA receptors	5	4	1	7.86E-5	1.89E-3	0.8	0.2
REACTOME_DAG_AND_IP3_SIGNALING	DAG and IP3 signaling	5	4	1	5.56E-5	1.43E-3	0.8	0.2
REACTOME_SIGNALING_BY_NOTCH3	Signaling by NOTCH3	5	4	1	1.33E-4	2.96E-3	0.8	0.2
REACTOME_FLT3_SIGNALING	FLT3 Signaling	12	9	3	1.79E-5	5.63E-4	0.75	0.25
REACTOME_SIGNALING_BY_NOTCH1	Signaling by NOTCH1	7	5	2	9.9E-6	3.51E-4	0.714286	0.285714
REACTOME_SIGNALING_BY_GPCR	Signaling by GPCR	45	32	13	2.72E-14	8.67E-12	0.711111	0.288889
REACTOME_GPCR_LIGAND_BINDING	GPCR ligand binding	25	17	8	1.39E-11	2.39E-9	0.68	0.32
REACTOME_SIGNALING_BY_NOTCH1_PEST_DOMAIN_MUTANTS_IN_CANCER	Signaling by NOTCH1 PEST Domain Mutants in Cancer	6	4	2	2.58E-5	7.79E-4	0.666667	0.333333
REACTOME_G_ALPHA_I_SIGNALLING_EVENTS	G alpha (i) signalling events	23	15	8	3.09E-11	4.93E-9	0.652174	0.347826
REACTOME_CLASS_A_1_RHODOPSIN_LIKE_RECEPTORS	Class A/1 (Rhodopsin-like receptors)	17	11	6	5.57E-8	5.65E-6	0.647059	0.352941
REACTOME_G_ALPHA_Q_SIGNALLING_EVENTS	G alpha (q) signalling events	14	9	5	4.88E-8	5.18E-6	0.642857	0.357143
KEGG_PATHWAYS_IN_CANCER	Pathways in cancer	13	8	5	2.97E-5	8.61E-4	0.615385	0.384615
KEGG_CALCIUM_SIGNALING_PATHWAY	Calcium signaling pathway	12	7	5	2.73E-7	2.03E-5	0.583333	0.416667
REACTOME_MAPK_FAMILY_SIGNALING_CASCADES	MAPK family signaling cascades	16	9	7	6.83E-8	6.35E-6	0.5625	0.4375
REACTOME_ANTI_INFLAMMATORY_RESPONSE_FAVOURING_LEISHMANIA_PARASITE_INFECTION	Anti-inflammatory response favouring Leishmania parasite infection	13	7	6	4.96E-7	2.99E-5	0.538462	0.461538
REACTOME_INTRACELLULAR_SIGNALING_BY_SECOND_MESSENGERS	Intracellular signaling by second messengers	13	7	6	1.48E-5	5.08E-4	0.538462	0.461538
REACTOME_DISEASES_OF_SIGNAL_TRANSDUCTION_BY_GROWTH_FACTOR_RECEPTORS_AND_SECOND_MESSENGERS	Diseases of signal transduction by growth factor receptors and second messengers	15	8	7	7.13E-6	2.74E-4	0.533333	0.466667
PID_ERBB4_PATHWAY	ErbB4 signaling events	6	3	3	2.09E-6	9.7E-5	0.5	0.5
KEGG_GAP_JUNCTION	Gap junction	8	4	4	3.66E-6	1.57E-4	0.5	0.5
REACTOME_PLATELET_ACTIVATION_SIGNALING_AND_AGGREGATION	Platelet activation, signaling and aggregation	14	7	7	4.95E-7	2.99E-5	0.5	0.5
REACTOME_SIGNALING_BY_RECEPTOR_TYROSINE_KINASES	Signaling by Receptor Tyrosine Kinases	20	9	11	2.56E-7	1.97E-5	0.45	0.55
NABA_CORE_MATRISOME	Ensemble of genes encoding core extracellular matrix including ECM glycoproteins, collagens and proteoglycans	24	13	16	1.12E-15	5e-13	0.448276	0.551724
REACTOME_LEISHMANIA_INFECTION	Leishmania infection	16	7	9	1.08E-7	9.23E-6	0.4375	0.5625
REACTOME_INFECTIOUS_DISEASE	Infectious disease	22	8	14	2.67E-5	7.95E-4	0.363636	0.636364
REACTOME_DISEASE	Disease	53	19	34	9.56E-16	5e-13	0.358491	0.641509
REACTOME_HEMOSTASIS	Hemostasis	28	10	18	4.08E-10	5.36E-8	0.357143	0.642857
KEGG_NEUROACTIVE_LIGAND_RECEPTOR_INTERACTION	Neuroactive ligand-receptor interaction	20	7	13	6.68E-12	1.24E-9	0.35	0.65
REACTOME_EXTRACELLULAR_MATRIX_ORGANIZATION	Extracellular matrix organization	21	7	14	5.37E-12	1.11E-9	0.333333	0.666667
PID_ENDOTHELIN_PATHWAY	Endothelins	6	2	4	4.16E-5	1.15E-3	0.333333	0.666667
REACTOME_GLYCOSAMINOGLYCAN_METABOLISM	Glycosaminoglycan metabolism	9	3	6	4.9E-6	2.02E-4	0.333333	0.666667
REACTOME_SIGNALING_BY_NUCLEAR_RECEPTORS	Signaling by Nuclear Receptors	12	4	8	5.43E-5	1.43E-3	0.333333	0.666667
PID_P53_DOWNSTREAM_PATHWAY	Direct p53 effectors	10	3	7	1.38E-6	7.19E-5	0.3	0.7
REACTOME_ESR_MEDIATED_SIGNALING	ESR-mediated signaling	10	3	7	8.95E-5	2.08E-3	0.3	0.7
PID_AP1_PATHWAY	AP-1 transcription factor network	7	2	5	6.83E-6	2.67E-4	0.285714	0.714286
REACTOME_DEGRADATION_OF_THE_EXTRACELLULAR_MATRIX	Degradation of the extracellular matrix	11	3	8	1.96E-7	1.62E-5	0.272727	0.727273
BIOCARTA_CDMAC_PATHWAY	Cadmium induces DNA synthesis and proliferation in macrophages	4	1	3	1.66E-5	5.46E-4	0.25	0.75
KEGG_ECM_RECEPTOR_INTERACTION	ECM-receptor interaction	8	2	6	2.17E-6	9.89E-5	0.25	0.75
REACTOME_INTEGRIN_CELL_SURFACE_INTERACTIONS	Integrin cell surface interactions	8	2	6	2.38E-6	1.06E-4	0.25	0.75
REACTOME_O_LINKED_GLYCOSYLATION	O-linked glycosylation	8	2	6	1.74E-5	5.54E-4	0.25	0.75
KEGG_MAPK_SIGNALING_PATHWAY	MAPK signaling pathway	16	4	12	1.63E-8	1.92E-6	0.25	0.75
NABA_ECM_GLYCOPROTEINS	Genes encoding structural ECM glycoproteins	16	4	12	1.86E-10	2.6E-8	0.25	0.75
REACTOME_CYTOKINE_SIGNALING_IN_IMMUNE_SYSTEM	Cytokine Signaling in Immune system	44	11	33	1.1E-18	1.23E-15	0.25	0.75
BIOCARTA_P53HYPOXIA_PATHWAY	Hypoxia and p53 in the Cardiovascular system	5	1	4	1.78E-6	8.64E-5	0.2	0.8
PID_NFAT_TFPATHWAY	Calcineurin-regulated NFAT-dependent transcription in lymphocytes	5	1	4	8.78E-5	2.06E-3	0.2	0.8
PID_TCR_CALCIUM_PATHWAY	Calcium signaling in the CD4+ TCR pathway	5	1	4	8.12E-6	3.02E-4	0.2	0.8
REACTOME_DISEASES_ASSOCIATED_WITH_GLYCOSAMINOGLYCAN_METABOLISM	Diseases associated with glycosaminoglycan metabolism	5	1	4	5.56E-5	1.43E-3	0.2	0.8
REACTOME_DISEASES_OF_GLYCOSYLATION	Diseases of glycosylation	11	2	9	2.42E-7	1.93E-5	0.181818	0.818182
REACTOME_DISEASES_OF_METABOLISM	Diseases of metabolism	11	2	9	4.47E-5	1.22E-3	0.181818	0.818182
PID_FRA_PATHWAY	Validated transcriptional targets of AP1 family members Fra1 and Fra2	6	1	5	1.77E-6	8.64E-5	0.166667	0.833333
REACTOME_DISEASES_ASSOCIATED_WITH_O_GLYCOSYLATION_OF_PROTEINS	Diseases associated with O-glycosylation of proteins	6	1	5	6.42E-5	1.59E-3	0.166667	0.833333
REACTOME_EXTRA_NUCLEAR_ESTROGEN_SIGNALING	Extra-nuclear estrogen signaling	6	1	5	1.11E-4	2.54E-3	0.166667	0.833333
REACTOME_HSF1_DEPENDENT_TRANSACTIVATION	HSF1-dependent transactivation	6	1	5	2.09E-6	9.7E-5	0.166667	0.833333
REACTOME_INTERFERON_ALPHA_BETA_SIGNALING	Interferon alpha/beta signaling	6	1	5	7.56E-5	1.83E-3	0.166667	0.833333
REACTOME_O_GLYCOSYLATION_OF_TSR_DOMAIN_CONTAINING_PROTEINS	O-glycosylation of TSR domain-containing proteins	6	1	5	2.44E-6	1.07E-4	0.166667	0.833333
NABA_ECM_REGULATORS	Genes encoding enzymes and their regulators involved in the remodeling of the extracellular matrix	12	2	10	6.1E-6	2.43E-4	0.166667	0.833333
REACTOME_INTERFERON_SIGNALING	Interferon Signaling	12	2	10	1.12E-6	6.24E-5	0.166667	0.833333
NABA_SECRETED_FACTORS	Genes encoding secreted soluble factors	18	3	15	1.63E-8	1.92E-6	0.166667	0.833333
PID_REG_GR_PATHWAY	Glucocorticoid receptor regulatory network	7	1	6	1.95E-5	6.05E-4	0.142857	0.857143
REACTOME_CELLULAR_RESPONSE_TO_HEAT_STRESS	Cellular response to heat stress	7	1	6	7.51E-5	1.83E-3	0.142857	0.857143
PID_INTEGRIN1_PATHWAY	Beta1 integrin cell surface interactions	8	1	7	3.35E-7	2.33E-5	0.125	0.875
NABA_MATRISOME_ASSOCIATED	Ensemble of genes encoding ECM-associated proteins including ECM-affilaited proteins, ECM regulators and secreted factors	40	5	35	1.24E-17	9.25E-15	0.125	0.875
REACTOME_INTERFERON_GAMMA_SIGNALING	Interferon gamma signaling	9	1	8	4.36E-7	2.87E-5	0.111111	0.888889
KEGG_CYTOKINE_CYTOKINE_RECEPTOR_INTERACTION	Cytokine-cytokine receptor interaction	11	1	10	8.7E-5	2.06E-3	0.0909091	0.909091
NABA_MATRISOME	Ensemble of genes encoding extracellular matrix and extracellular matrix-associated proteins	64	4	51	9.76E-32	2.18E-28	0.0727273	0.927273
REACTOME_INNATE_IMMUNE_SYSTEM	Innate Immune System	42	3	39	2.67E-13	6.62E-11	0.0714286	0.928571
REACTOME_SIGNALING_BY_INTERLEUKINS	Signaling by Interleukins	20	1	19	6.35E-8	6.16E-6	0.05	0.95
REACTOME_NEUTROPHIL_DEGRANULATION	Neutrophil degranulation	28	1	27	1.17E-13	3.27E-11	0.0357143	0.964286
BIOCARTA_TSP1_PATHWAY	TSP-1 Induced Apoptosis in Microvascular Endothelial Cell	3	0	3	3.42E-5	9.67E-4	0	1
REACTOME_GROWTH_HORMONE_RECEPTOR_SIGNALING	Growth hormone receptor signaling	4	0	4	9.11E-5	2.1E-3	0	1
REACTOME_REGULATION_OF_TLR_BY_ENDOGENOUS_LIGAND	Regulation of TLR by endogenous ligand	5	0	5	1.04E-6	5.92E-5	0	1
PID_IL12_2PATHWAY	IL12-mediated signaling events	6	0	6	4.16E-5	1.15E-3	0	1
KEGG_P53_SIGNALING_PATHWAY	p53 signaling pathway	7	0	7	5.62E-6	2.28E-4	0	1
PID_IL6_7_PATHWAY	IL6-mediated signaling events	7	0	7	4.37E-7	2.87E-5	0	1
KEGG_LEISHMANIA_INFECTION	Leishmania infection	8	0	8	6.62E-7	3.89E-5	0	1
NABA_ECM_AFFILIATED	Genes encoding proteins affiliated structurally or functionally to extracellular matrix proteins	10	0	10	9.56E-6	3.44E-4	0	1
REACTOME_INTERLEUKIN_4_AND_INTERLEUKIN_13_SIGNALING	Interleukin-4 and Interleukin-13 signaling	11	0	11	1.77E-8	1.97E-6	0	1
KEGG_CHEMOKINE_SIGNALING_PATHWAY	Chemokine signaling pathway	10			2.4E-5	7.33E-4	#DIV/0!	#DIV/0!
WNT_SIGNALING	Genes related to Wnt-mediated signal transduction	7			3.33E-5	9.54E-4	#DIV/0!	#DIV/0!
REACTOME_COLLAGEN_DEGRADATION	Collagen degradation	6			4.55E-5	1.22E-3	#DIV/0!	#DIV/0!
REACTOME_TRANSPORT_OF_SMALL_MOLECULES	Transport of small molecules	20			5.85E-5	1.48E-3	#DIV/0!	#DIV/0!
REACTOME_ECM_PROTEOGLYCANS	ECM proteoglycans	6			1.2E-4	2.7E-3	#DIV/0!	#DIV/0!
Associative analysis of DEGs for comparison groups was carried out according to the GSEA database. The number of up-regulated (Up) and down-regulated (Down) DEGs, as well as the P-values are shown. Functional annotations with a P-value <0.05 were selected for analysis.
The functional annotations associated with more than 80 presents of up-regulated DEGs
The functional annotations associated with more than 80 presents of down-regulated DEGs
