# Supplementary material for: Novel Insights into the Protective Properties of ACTH(4-7)PGP (Semax) Peptide at the Transcriptome Level Following Cerebral Ischaemia–Reperfusion in Rats
Source: Genes (Basel). 2020 Jun 22;11(6):681. doi: 10.3390/genes11060681 (PMC7350263; doi:10.3390/genes11060681)
Supplement: Supplementary file 1 [file genes-11-00681-s001.zip › Supplementary Table S9.xlsx]

## Sheet: R_SI24
Table S9. Analysis of the functional annotations of DEGs in IS24 vs. IR24 using gProfileR
source	term_name	p_adj_color	adjusted_p_value__query_1	number of DEGs	Up	Down	Up/(Up+Down), %	Down/(Up+Down), %
KEGG	Spinocerebellar ataxia	0.0487974	0.0487974	7	7	0	1	0
KEGG	Glutamatergic synapse	0.0166813	0.0166813	9	9	0	1	0
KEGG	Morphine addiction	0.00806731	0.00806731	9	9	0	1	0
KEGG	Gap junction	0.0147837	0.0147837	8	7	1	0.875	0.125
KEGG	Aldosterone synthesis and secretion	0.0474952	0.0474952	7	6	1	0.857143	0.142857
KEGG	Melanogenesis	0.0474952	0.0474952	7	6	1	0.857143	0.142857
KEGG	Calcium signaling pathway	0.00648961	0.00648961	14	12	2	0.857143	0.142857
KEGG	Gastric acid secretion	0.0474952	0.0474952	6	5	1	0.833333	0.166667
KEGG	Long-term potentiation	0.0351711	0.0351711	6	5	1	0.833333	0.166667
KEGG	Dopaminergic synapse	0.00284909	0.00284909	12	10	2	0.833333	0.166667
KEGG	Alcoholism	0.0250387	0.0250387	10	8	2	0.8	0.2
KEGG	Cholinergic synapse	0.00816271	0.00816271	10	8	2	0.8	0.2
KEGG	Cocaine addiction	3.16448e-05	3.16448e-05	10	8	2	0.8	0.2
KEGG	Circadian entrainment	0.0088893	0.0088893	9	7	2	0.777778	0.222222
KEGG	cAMP signaling pathway	0.000825749	0.000825749	17	13	4	0.764706	0.235294
KEGG	Inflammatory mediator regulation of TRP channels	0.039407	0.039407	8	6	2	0.75	0.25
KEGG	Amphetamine addiction	5.52831e-05	5.52831e-05	11	8	3	0.727273	0.272727
KEGG	Renin secretion	0.0456602	0.0456602	6	4	2	0.666667	0.333333
KEGG	Neuroactive ligand-receptor interaction	0.0003865	0.0003865	24	16	8	0.666667	0.333333
KEGG	Vascular smooth muscle contraction	0.0166813	0.0166813	10	6	4	0.6	0.4
KEGG	Basal cell carcinoma	0.0106227	0.0106227	7	4	3	0.571429	0.428571
WP	Myometrial Relaxation and Contraction Pathways	0.0491493	0.0491493	13	7	6	0.538462	0.461538
KEGG	Pathways in cancer	0.00816271	0.00816271	26	14	12	0.538462	0.461538
KEGG	Transcriptional misregulation in cancer	0.00284909	0.00284909	14	6	8	0.428571	0.571429
KEGG	Breast cancer	0.00284909	0.00284909	13	5	8	0.384615	0.615385
KEGG	PI3K-Akt signaling pathway	0.0106227	0.0106227	19	7	12	0.368421	0.631579
KEGG	Proteoglycans in cancer	0.0088893	0.0088893	14	5	9	0.357143	0.642857
KEGG	MAPK signaling pathway	0.022813	0.022813	16	5	11	0.3125	0.6875
WP	Spinal Cord Injury	0.00634078	0.00634078	13	4	9	0.307692	0.692308
KEGG	Thyroid cancer	0.0166813	0.0166813	5	1	4	0.2	0.8
KEGG	Kaposi sarcoma-associated herpesvirus infection	0.0456602	0.0456602	11	2	9	0.181818	0.818182
KEGG	Glioma	0.0474952	0.0474952	6	1	5	0.166667	0.833333
KEGG	Apoptosis	0.0351711	0.0351711	9	1	8	0.111111	0.888889
KEGG	C-type lectin receptor signaling pathway	0.00284909	0.00284909	11	1	10	0.0909091	0.909091
KEGG	Tuberculosis	0.0111707	0.0111707	12	1	11	0.0833333	0.916667
KEGG	Epstein-Barr virus infection	0.0214748	0.0214748	13	0	13	0	1
KEGG	IL-17 signaling pathway	0.0456602	0.0456602	7	0	7	0	1
KEGG	Leishmaniasis	0.0166813	0.0166813	7	0	7	0	1
KEGG	Malaria	0.0166813	0.0166813	6	0	6	0	1
KEGG	Osteoclast differentiation	0.0288729	0.0288729	9	0	9	0	1
KEGG	p53 signaling pathway	0.0166813	0.0166813	7	0	7	0	1
KEGG	Phagosome	0.00648961	0.00648961	13	0	13	0	1
KEGG	Rheumatoid arthritis	0.0437492	0.0437492	7	0	7	0	1
KEGG	Staphylococcus aureus infection	0.0456602	0.0456602	7	0	7	0	1
KEGG	TNF signaling pathway	0.0437492	0.0437492	8	0	8	0	1
WP	Prostaglandin Synthesis and Regulation	0.0379213	0.0379213	6	0	6	0	1
KEGG	GnRH signaling pathway	0.0166813	0.0166813	8			#DIV/0!	#DIV/0!
KEGG	Estrogen signaling pathway	0.0377177	0.0377177	9			#DIV/0!	#DIV/0!
Associative analysis of DEGs for comparison groups was carried out according to the gProfileR database. The number of up-regulated (Up) and down-regulated (Down) DEGs, as well as the P-values are shown. Functional annotations with a P-value <0.05 were selected for analysis.
The functional annotations associated with more than 80 presents of up-regulated DEGs
The functional annotations associated with more than 80 presents of down-regulated DEGs
